# Supplementary material
Source: PubMed Central journal article supplement (PMC3576474)
Supplement: 12_175_Dono.Suppl.pdf [file 12_175_Dono.Suppl.pdf]

Supplemental Data

Low Percentage of KRAS Mutations Revealed by Locked Nucleic Acid Polymerase Chain Reaction: Implications for Treatment of Metastatic Colorectal Cancer

Mariella Dono,<sup>1,2</sup> Carlotta Massucco,<sup>1</sup> Silvana Chiara,<sup>3</sup> Claudia Sonaglio,<sup>3</sup> Marco Mora,<sup>2</sup> Anna Truini,<sup>1</sup> Giannamaria Cerruti,<sup>1</sup> Gabriele Zoppoli,<sup>4</sup> Alberto Ballestrero,<sup>4</sup> Mauro Truini,<sup>2</sup> Manlio Ferrarini,<sup>5</sup> and Simona Zupo<sup>1</sup>

Online address: <http://www.molmed.org>

The Feinstein Institute for Medical Research 

Supplementary Table S1. Molecular data of a cohort of 213 mCRC patients.

| Patient | Sequencing | KRAS |          | BRAF Sequencing |
|---------|------------|------|----------|-----------------|
|         |            | DXS  | LightMix |                 |
| 1       | 13D        | 13D  | 13D      | wt              |
| 2       | 13D        | 13D  | 13D      | wt              |
| 3       | 12A        | 12A  | 12A      | wt              |
| 4       | 13D        | 13D  | 13D      | wt              |
| 5       | 12D        | 12D  | 12D      | wt              |
| 6       | 12D        | 12D  | 12D      | wt              |
| 7       | 13D        | 13D  | 13D      | wt              |
| 8       | 12D        | 12D  | 12D      | wt              |
| 9       | 12A        | 12A  | 12A      | wt              |
| 10      | 12D        | 12D  | 12D      | wt              |
| 11      | wt         | 12S  | 12S      | wt              |
| 12      | 13D        | 13D  | 13D      | wt              |
| 13      | 12D        | 12D  | 12D      | wt              |
| 14      | 12A        | 12A  | 12A      | wt              |
| 15      | 12R        | 12R  | 12R      | wt              |
| 16      | 12A        | 12A  | 12A      | wt              |
| 17      | 12V        | 12V  | 12V      | wt              |
| 18      | 12V        | 12V  | 12V      | wt              |
| 19      | 12S        | 12S  | 12S      | wt              |
| 20      | 13C        | nd   | 13C      | wt              |
| 21      | 13D        | 13D  | 13D      | wt              |
| 22      | 12D        | 12D  | 12D      | wt              |
| 23      | 12D        | 12D  | 12D      | wt              |
| 24      | 13D        | 13D  | 13D      | wt              |
| 25      | 13D        | 13D  | 13D      | wt              |
| 26      | 12D        | 12D  | 12D      | wt              |
| 27      | 12D        | 12D  | 12D      | wt              |
| 28      | 12D        | 12D  | 12D      | wt              |
| 29      | 12D        | 12D  | 12D      | wt              |
| 30      | 12D        | 12D  | 12D      | wt              |
| 31      | 13D        | 13D  | 13D      | wt              |
| 32      | 12S        | 12S  | 12S      | wt              |
| 33      | 12D        | 12D  | 12D      | wt              |
| 34      | 12A        | 12A  | 12A      | wt              |
| 35      | 13D        | 13D  | 13D      | wt              |
| 36      | 12V        | 12V  | 12V      | wt              |
| 37      | 12D        | 12D  | 12D      | wt              |
| 38      | wt         | 12V  | 12V      | wt              |

Continued in next column

Supplementary Table S1. Continued.

|    |         |         |         |       |
|----|---------|---------|---------|-------|
| 39 | 12V     | 12V     | 12V     | wt    |
| 40 | 12V     | 12V     | 12V     | wt    |
| 41 | 12S     | 12S     | 12S     | wt    |
| 42 | 12S     | 12S     | 12S     | wt    |
| 43 | wt      | 12D     | 12D     | wt    |
| 44 | 12V     | 12V     | 12V     | wt    |
| 45 | 13D     | 13D     | 13D     | wt    |
| 46 | 12D     | 12D     | 12D     | wt    |
| 47 | 12D     | 12D     | 12D     | wt    |
| 48 | 12A     | 12A     | 12A     | wt    |
| 49 | 12V     | 12V     | 12V     | wt    |
| 50 | 12D     | 12D     | 12D     | wt    |
| 51 | 12D     | 12D     | 12D     | wt    |
| 52 | 12V/12C | 12V/12C | 12V/12C | wt    |
| 53 | 12D     | 12D     | 12D     | wt    |
| 54 | 12D     | 12D     | 12D     | wt    |
| 55 | 12V     | 12V     | 12V     | wt    |
| 56 | 12A     | 12A     | 12A     | wt    |
| 57 | 12D     | 12D     | 12D     | wt    |
| 58 | 12D     | 12D     | 12D     | wt    |
| 59 | 12S     | 12S     | 12S     | wt    |
| 60 | 12V     | 12V     | 12V     | wt    |
| 61 | 12D     | 12D     | 12D     | wt    |
| 62 | 13D     | 13D     | 13D     | wt    |
| 63 | 12D     | 12D     | 12D     | wt    |
| 64 | 12V     | 12V     | 12V     | wt    |
| 65 | wt      | wt      | wt      | wt    |
| 66 | wt      | wt      | wt      | wt    |
| 67 | wt      | wt      | wt      | wt    |
| 68 | wt      | wt      | wt      | V600E |
| 69 | wt      | wt      | 12D     | wt    |
| 70 | wt      | wt      | 12A     | wt    |
| 71 | wt      | wt      | 13C     | wt    |
| 72 | wt      | wt      | wt      | V600E |
| 73 | wt      | wt      | wt      | wt    |
| 74 | wt      | wt      | 12D     | wt    |
| 75 | wt      | wt      | wt      | wt    |
| 76 | wt      | wt      | 12D     | wt    |
| 77 | wt      | wt      | wt      | wt    |
| 78 | wt      | wt      | wt      | V600E |
| 79 | wt      | wt      | wt      | V600E |
| 80 | wt      | wt      | wt      | wt    |

Continued on next page

KRAS MUTATIONS AND RESPONSE TO THERAPY IN MCRC

Supplementary Table S1. Continued.

|     |    |    |     |       |
|-----|----|----|-----|-------|
| 81  | wt | wt | wt  | wt    |
| 82  | wt | wt | wt  | wt    |
| 83  | wt | wt | 13S | wt    |
| 84  | wt | wt | wt  | wt    |
| 85  | wt | wt | wt  | wt    |
| 86  | wt | wt | 12D | wt    |
| 87  | wt | wt | wt  | wt    |
| 88  | wt | wt | 12S | wt    |
| 89  | wt | wt | wt  | wt    |
| 90  | wt | wt | wt  | wt    |
| 91  | wt | wt | wt  | wt    |
| 92  | wt | wt | 12A | wt    |
| 93  | wt | wt | wt  | wt    |
| 94  | wt | wt | wt  | wt    |
| 95  | wt | wt | wt  | wt    |
| 96  | wt | wt | 12S | wt    |
| 97  | wt | wt | wt  | V600E |
| 98  | wt | wt | 12D | wt    |
| 99  | wt | wt | wt  | wt    |
| 100 | wt | wt | wt  | wt    |
| 101 | wt | wt | 12V | wt    |
| 102 | wt | wt | wt  | wt    |
| 103 | wt | wt | wt  | wt    |
| 104 | wt | wt | 12D | wt    |
| 105 | wt | wt | 12D | wt    |
| 106 | wt | wt | 12T | wt    |
| 107 | wt | wt | 13C | wt    |
| 108 | wt | wt | 12D | wt    |
| 109 | wt | wt | 12V | wt    |
| 110 | wt | wt | 12A | wt    |
| 111 | wt | wt | wt  | V600E |
| 112 | wt | wt | 12D | wt    |
| 113 | wt | wt | 12A | wt    |
| 114 | wt | wt | wt  | wt    |
| 115 | wt | wt | wt  | wt    |
| 116 | wt | wt | 12D | wt    |
| 117 | wt | wt | 13D | wt    |
| 118 | wt | wt | 12S | wt    |
| 119 | wt | wt | wt  | wt    |
| 120 | wt | wt | wt  | wt    |
| 121 | wt | wt | wt  | wt    |
| 122 | wt | wt | wt  | wt    |
| 123 | wt | wt | wt  | wt    |
| 124 | wt | wt | 12A | wt    |
| 125 | wt | wt | wt  | wt    |
| 126 | wt | wt | wt  | wt    |
| 127 | wt | wt | wt  | wt    |
| 128 | wt | wt | wt  | wt    |
| 129 | wt | wt | wt  | wt    |
| 130 | wt | wt | 13D | wt    |
| 131 | wt | wt | wt  | V600E |
| 132 | wt | wt | wt  | wt    |
| 133 | wt | wt | wt  | wt    |
| 134 | wt | wt | wt  | V600E |
| 135 | wt | wt | wt  | V600E |
| 136 | wt | wt | 12D | wt    |
| 137 | wt | wt | wt  | wt    |
| 138 | wt | wt | wt  | wt    |
| 139 | wt | wt | wt  | wt    |
| 140 | wt | wt | wt  | wt    |
| 141 | wt | wt | wt  | wt    |
| 142 | wt | wt | 12D | wt    |
| 143 | wt | wt | wt  | V600E |
| 144 | wt | wt | 12D | wt    |
| 145 | wt | wt | wt  | wt    |

Supplementary Table S1. Continued.

|     |     |     |         |       |
|-----|-----|-----|---------|-------|
| 146 | wt  | wt  | 12D     | wt    |
| 147 | wt  | wt  | wt      | V600E |
| 148 | wt  | wt  | wt      | wt    |
| 149 | wt  | wt  | 13S     | wt    |
| 150 | wt  | wt  | 12R     | wt    |
| 151 | wt  | wt  | wt      | wt    |
| 152 | wt  | wt  | wt      | wt    |
| 153 | wt  | wt  | wt      | V600E |
| 154 | wt  | wt  | wt      | wt    |
| 155 | wt  | wt  | wt      | wt    |
| 156 | wt  | wt  | wt      | wt    |
| 157 | wt  | wt  | 12V     | wt    |
| 158 | wt  | wt  | 12V     | wt    |
| 159 | wt  | wt  | 13S     | wt    |
| 160 | 12V | 12V | 12V     | wt    |
| 161 | 12A | 12A | 12A     | wt    |
| 162 | 12D | 12D | 12D     | wt    |
| 163 | 12D | 12D | 12D     | wt    |
| 164 | 12V | 12V | 12V     | wt    |
| 165 | 13D | 13D | 13D     | wt    |
| 166 | 12A | 12A | 12A     | wt    |
| 167 | 12V | 12V | 12V     | wt    |
| 168 | 13C | nd  | 13C     | wt    |
| 169 | 12A | 12A | 12A     | wt    |
| 170 | 12D | 12D | 12D     | wt    |
| 171 | 12D | 12D | 12D     | wt    |
| 172 | 12V | 12V | 12V     | wt    |
| 173 | 13D | 13D | 13D     | wt    |
| 174 | 12V | 12V | 12V     | wt    |
| 175 | 12D | 12D | 12D     | wt    |
| 176 | 13D | 13D | 13D     | wt    |
| 177 | 12D | 12D | 12D     | wt    |
| 178 | 12D | 12D | 12D     | wt    |
| 179 | 12C | 12C | 12C     | wt    |
| 180 | wt  | wt  | wt      | wt    |
| 181 | wt  | wt  | wt      | wt    |
| 182 | wt  | wt  | wt      | wt    |
| 183 | wt  | wt  | 13D     | wt    |
| 184 | wt  | wt  | wt      | wt    |
| 185 | wt  | wt  | wt      | V600E |
| 186 | wt  | wt  | wt      | wt    |
| 187 | wt  | wt  | wt      | wt    |
| 188 | wt  | wt  | 12V     | wt    |
| 189 | wt  | wt  | wt      | wt    |
| 190 | wt  | wt  | wt      | wt    |
| 191 | wt  | wt  | wt      | wt    |
| 192 | wt  | wt  | 12D/13D | wt    |
| 193 | wt  | wt  | wt      | wt    |
| 194 | wt  | wt  | 12D     | wt    |
| 195 | wt  | wt  | 12D/13S | wt    |
| 196 | wt  | wt  | wt      | wt    |
| 197 | wt  | wt  | wt      | wt    |
| 198 | wt  | wt  | 12V     | wt    |
| 199 | wt  | wt  | wt      | wt    |
| 200 | wt  | wt  | wt      | wt    |
| 201 | wt  | wt  | wt      | V600E |
| 202 | wt  | wt  | wt      | wt    |
| 203 | wt  | wt  | wt      | wt    |
| 304 | wt  | wt  | wt      | wt    |
| 205 | wt  | wt  | 12V     | wt    |
| 206 | wt  | wt  | wt      | wt    |
| 207 | wt  | wt  | 12D     | wt    |
| 208 | wt  | wt  | 12D     | wt    |
| 209 | wt  | wt  | wt      | wt    |
| 210 | wt  | wt  | wt      | wt    |
| 211 | wt  | wt  | wt      | wt    |
| 212 | wt  | wt  | wt      | V600E |
| 213 | wt  | wt  | wt      | wt    |

Continued in next column

nd: not detectable
